# Supplementary material for: Ultrathin hollow hemisphere-carbon-anchored Ni3FeN nanoparticles as nanoreactors facilitating the formation of NiCx with long-term durability for the oxygen evolution reaction
Source: Royal Society of Chemistry journal article supplement (doi:10.1039/d1ta10670h), 2022-01-01
Supplement: d1ta10670h1.pdf [file d1ta10670h1.pdf]

## Supplementary Information

Ultrathin hollow hemisphere-carbon-anchored Ni<sub>3</sub>FeN nanoparticles as nanoreactors facilitating the formation of NiC<sub>x</sub> with long-term durability for the oxygen evolution reaction

Liang Yu,<sup>‡</sup> Gaowei Zhang,<sup>‡</sup> Huanhui Chen, Junrong Zeng, Ya Liu, Qixin Yang, Liubiao Zhong\* and Yejun Qiu\*

Shenzhen Engineering Lab of Flexible Transparent Conductive Films, School of Materials Science and Engineering, Harbin Institute of Technology, Shenzhen, 518055, China. E-mail:

yejunqiu@hit.edu.cn, zhongliubiao@hit.edu.cn

<sup>‡</sup> These authors contributed equally.

## **1. Experimental section**

### **1.1 Prepared Electrodes**

**Synthesis of SiO<sub>2</sub> Templates:** All the chemicals were analytical grade; they were used without further purification. The SiO<sub>2</sub> Templates were prepared as previous reports.<sup>1</sup> 300 mL of ethanol, 6 mL of distilled water, 21 mL of ammonia and 24 mL of tetraethoxysilane (TEOS) were stirring at 35 °C for 8 h. The white precipitate was centrifuged and washed with ethanol and distilled water, and calcinated at 420 °C for 2 h in air.

### **Synthesis of HC/NF**

Nickel Foam (NF) was soaked in ethanol continuous ultrasound for 30 min and repeated 3 times to obtain clean NFs. The as prepared SiO<sub>2</sub> and pitch with a mass ratio of 1:0.09 were added into tetrahydrofuran (THF) under violently stirring for 4 h. Take 240 μL mixed solution and apply it to the blank Ni foam. NF with solution was carbonized under N<sub>2</sub> flow at several temperature (550 °C, 650 °C, 750 °C, 850 °C, 950 °C) for 2 h with a heating rate of 5 °C min<sup>-1</sup>. After being cooled down to room temperature, the Ni foam (NF) with production (pre-HC) were dipped in NaOH solution 48 h to removed SiO<sub>2</sub> templates. Pre-HC/NF were washed several times (DI water and ethanol) and dried at 60 °C for 2 h. HC/NF was obtained by annealing Ni<sub>3</sub>Fe-HC/NF at 400 °C for 2 h under NH<sub>3</sub> (heating rate: 5 °C min<sup>-1</sup>).

### **Synthesis of Ni<sub>3</sub>FeN-HC/NF**

Ni<sub>3</sub>FeN-HC/NF was prepared similarly to HC/NF, but nickel nitrate and iron nitrate with a molar ratio of 3:1 are added to the mixture of SiO<sub>2</sub> and pitch. The NF with precursor of Ni<sub>3</sub>FeN-HC was calcined under N<sub>2</sub> atmosphere for 2h at 850 °C (heating

rate: 5 °C min<sup>-1</sup>); then, the SiO<sub>2</sub> in product were removed by immersion in NaOH solution to get pre-Ni<sub>3</sub>FeN-HC/NF; finally, the Ni<sub>3</sub>FeN-HC/NF was obtained by calcining pre-Ni<sub>3</sub>FeN-HC/NF under NH<sub>3</sub> for 2 h at 400 °C (heating rate: 5 °C min<sup>-1</sup>).

#### **Synthesis of Ni<sub>3</sub>FeN-HC/NF(D)**

Dropping nickel nitrate and iron nitrate with a molar ratio of 3:1 to the pre-HC/NF, and was subjected to the same nitriding process to obtain Ni<sub>3</sub>FeN-HC/NF(D).

#### **Synthesis of Ni<sub>3</sub>FeN-C/NF**

Ni<sub>3</sub>FeN-C/NF was prepared by the same method with Ni<sub>3</sub>FeN-HC/NF but without SiO<sub>2</sub>.

#### **Synthesis of Ni<sub>3</sub>FeN/NF**

Iron nitrate and nickel nitrate were dissolved in THF in a ratio of 1:3, and then dropped onto NF nickel. Then it was held at 850 °C in nitrogen atmosphere for 2 h, followed by 400 °C in ammonia atmosphere for 2 h, which was consistent with the high-temperature treatment process of HC/NF to obtain electrode Ni<sub>3</sub>FeN/NF.

**Commercial RuO<sub>2</sub>/C/NF (Pt/C/NF) electrode:** for comparison, RuO<sub>2</sub>/C/NF (Pt/C/NF) electrode was prepared as follow: 5.0 mg of RuO<sub>2</sub>/C (Pt/C) were dispersed in a mixture containing 20 μL Nafion (5 w%), 50 μL ethanol, 50 μL isopropanol, the mixture solution was ultrasonicated for 30 min to obtain ink. 120 μL ink was then loaded on a clean 1 cm \*1 cm NF.

## **1.2 Materials characterization**

Thermogravimetric (TG) was carried out with a STA449F5 instrument and the temperature range is 20-1000 °C with a heating rate of 10 °C min<sup>-1</sup> under the N<sub>2</sub> atmosphere. The X-ray diffraction (XRD) measurement were carried out on an X-ray diffractometer (Panalytical Aries) with Cu-K $\alpha$  radiation ( $\lambda = 1.5418 \text{ \AA}$ ). Renishaw/inVia Qontor with an excitation laser of 532 nm was used to detect Raman signal. The X-ray photoelectron spectroscopy (XPS; Thermo Fisher, USA) was recorded with a monochromatic Al K $\alpha$  radiation source, and was corrected for surface charging by referencing to the designate hydrocarbon C 1s binding energy at 284.8 eV. Transmission electron microscopy (TEM) images were obtained on JEM-2100 (Japan) transmission electron microscope at an operating voltage of 200 kV. Brunauer-Emmet-Teller analysis was done on a Micromeritics Instrument Corporation sorption analyzer (Micromeritics TriStar II 3020). Total Organic Carbon (TOC) was measured with ELEMENTAR, vario TOC. Inductively Coupled Plasma Mass Spectrometry (ICP-MS) was obtained with Agilent 7700s. The contact angle (CA) measurements were performed on a Kino SL250 system at ambient temperature.

## **1.3 Electrochemical measurements:**

Electrochemical experiments were done on a typical three-electrode system by an electrochemical work station (CHI 760E) and with an electrolyte of 1 M O<sub>2</sub>-saturated KOH solution for OER test. A prepared electrode, a Hg/HgO electrode, a graphite rod

was used as the working, reference, counter electrodes, respectively. Before the linear sweep voltammetry (LSV) tests for OER, the repeated cyclic voltammogram (CV) cycles were carried out with a scan rate of  $100 \text{ mV s}^{-1}$  to obtain steady voltammogram curves, and the LSV were tested with a scan rate of  $5 \text{ mV s}^{-1}$ . The OER polarization curves were 85% iR-corrected. The EIS measurement were performed at 294 mV (vs. RHE) with the scanning frequency values ranging from 100 kHz to 0.01 Hz. The electrochemical double-layer capacitance ( $C_{dl}$ ) of the catalytic surface was obtained by CV test in a non-faradaic potential range of 0.781~0.881 V (vs. RHE) at various scan rate ( $v$ ) of 5, 10, 20, 40, 60, 80, 100, 120, 140, 160 180 and 200  $\text{mV s}^{-1}$ . By plotting the current density ( $J$ ) difference between the anodic and cathodic sweeps at the middle potential versus scan rate,  $C_{dl}$  is half of the linear slope.<sup>2</sup> The electrochemically active surface area (ECSA) could be estimated by the  $C_{dl}$  ( $\text{ECSA} = C_{dl}/C_s$ ,  $C_s = 0.060 \text{ mF cm}^{-2}$ )<sup>3</sup>. All potentials in this work were referenced to the reversible hydrogen electrode (RHE), and the converted equation is  $E(\text{RHE}) = E(\text{Hg}/\text{HgO}) + E_{\text{Hg}/\text{HgO}}^0 (0.924 \text{ V})$  in 1 M KOH at pH=14<sup>4</sup>.

## 2. Figures and tables

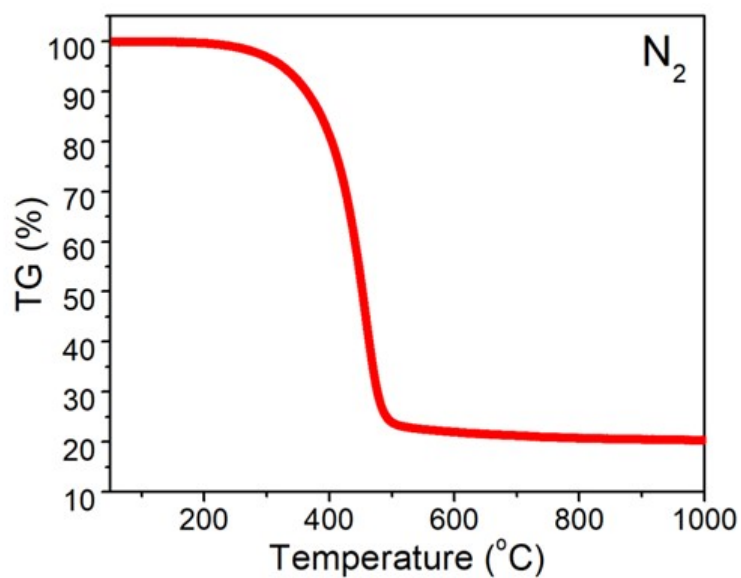

Figure. S1 TG curves of Pitch

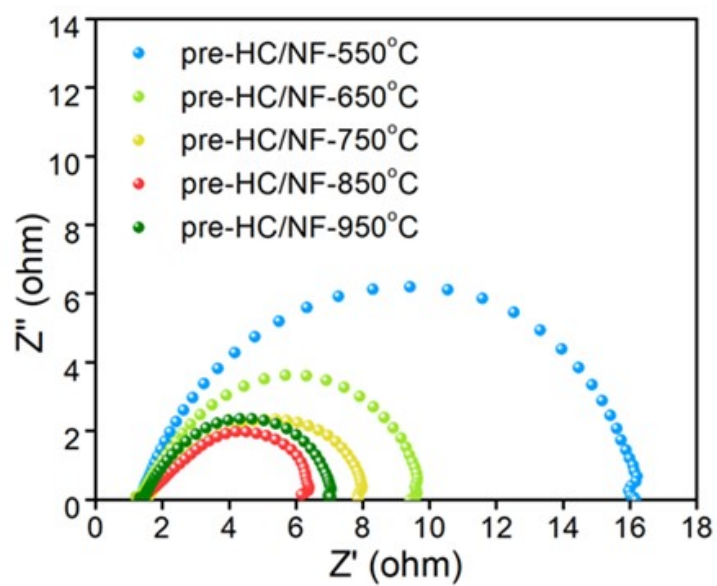

Figure. S2 Nyquist plots of pre-HC/NF in 1 M KOH.

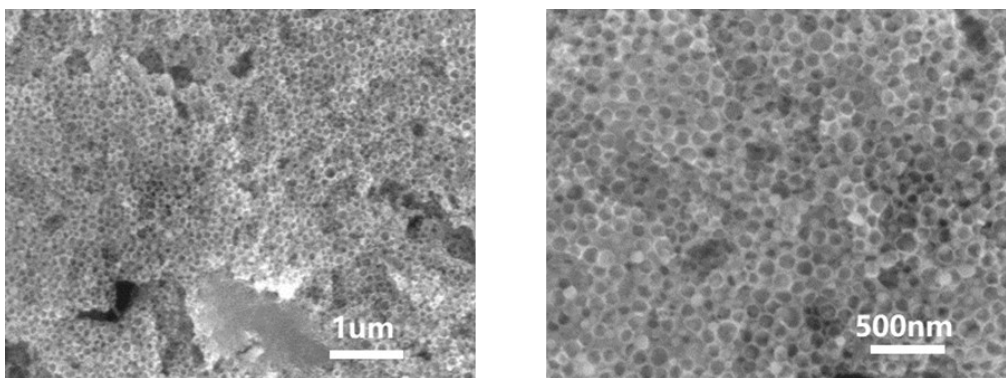

Figure S3. SEM images of pre-HC/NF (850 °C).

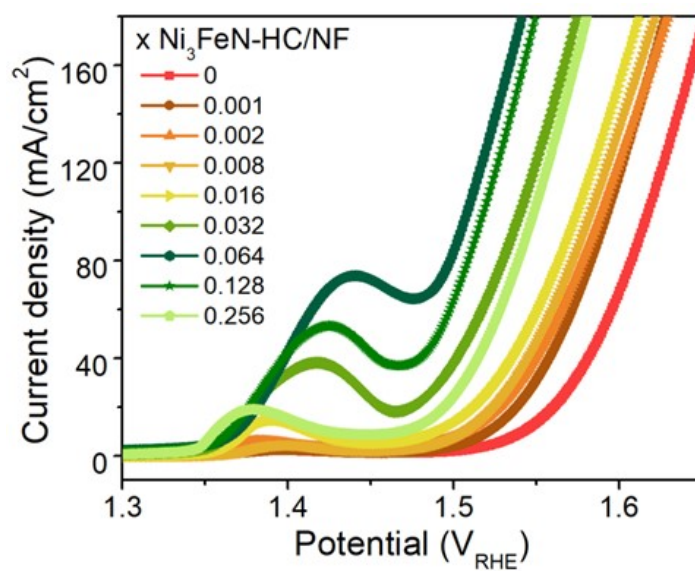

Figure S4. OER linear sweeping voltammetry curves of X Ni<sub>3</sub>FeN-HC/NF in 1 M KOH.

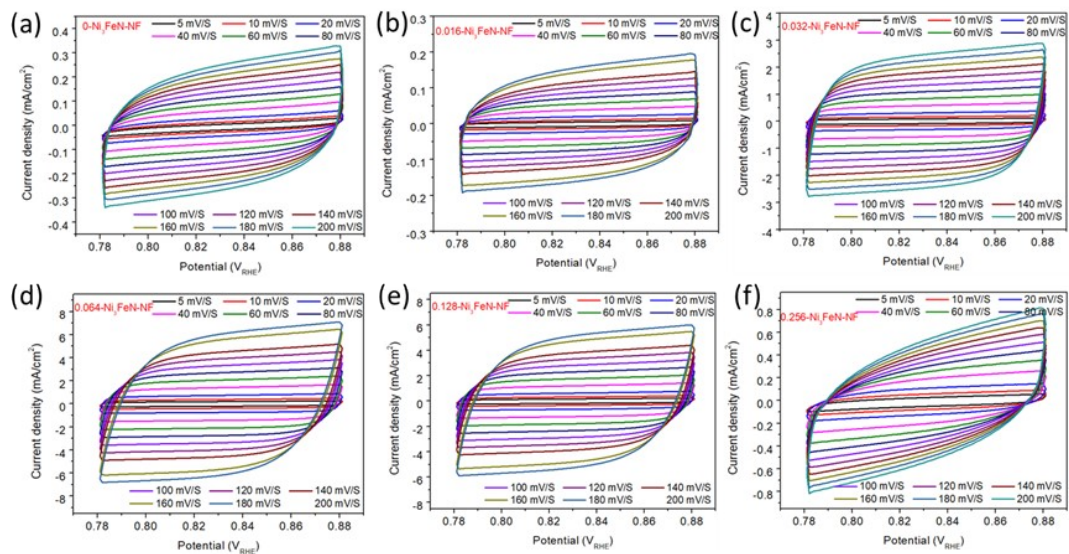

Figure. S5. Cyclic voltammograms at different scan rates in the potential range of 0.781-0.881 V (vs. RHE) for x-Ni<sub>3</sub>FeN-HC/NF electrodes.

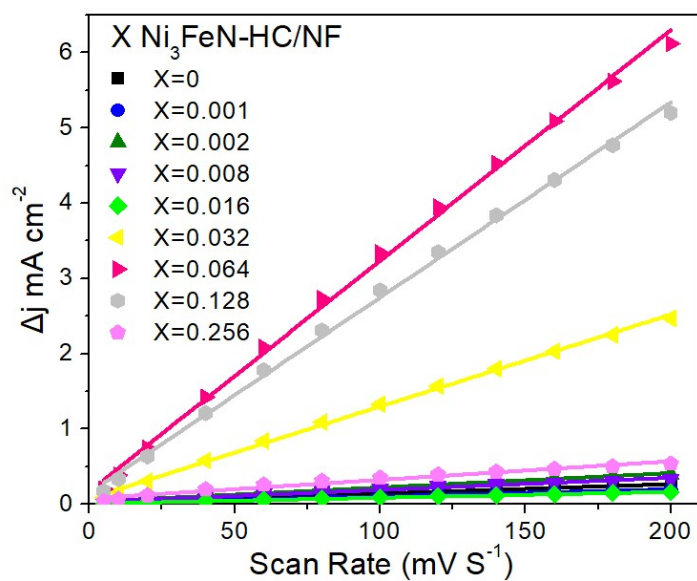

Figure. S6. The double-layer current density difference plotted as a function of scan rate fitted to a linear regression for  $C_{dl}$  of x-Ni<sub>3</sub>FeN-HC/NF.



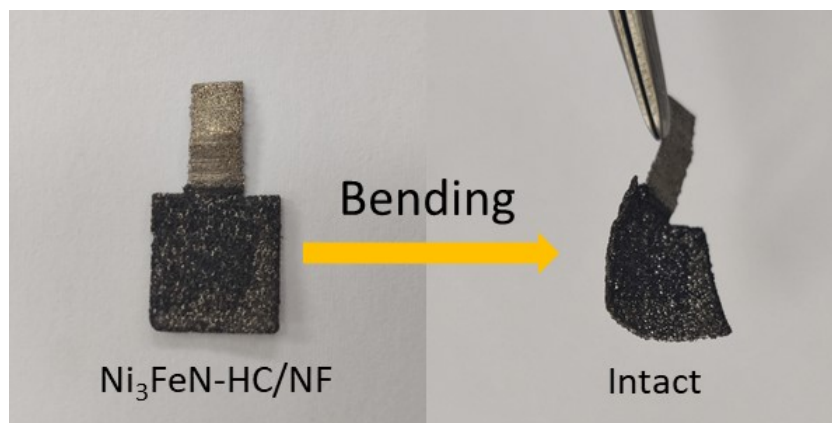

Figure. S7. Photographs of  $\text{Ni}_3\text{FeN-HC/NF}$  at original and bending states.

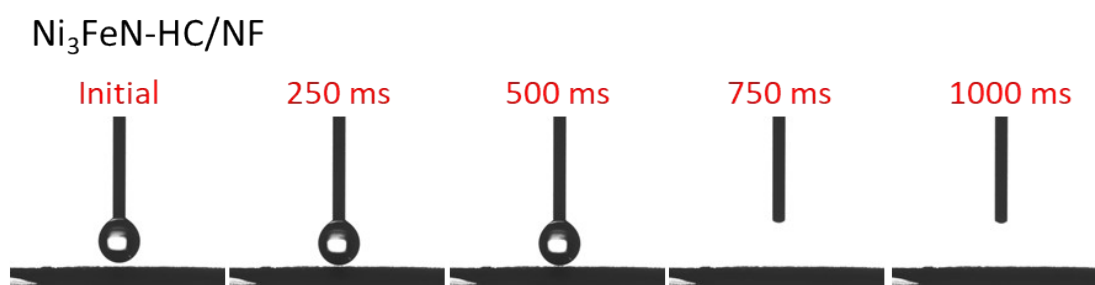

Figure. S8. Penetration process of a water droplet on  $\text{Ni}_3\text{FeN-HC/NF}$ .

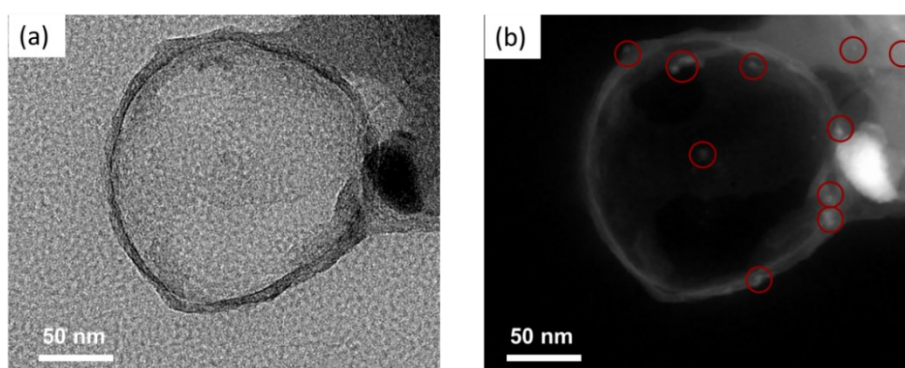

Figure. S9. TEM and HAADF-STEM patterns of  $\text{Ni}_3\text{FeN-HC/NF}$ .

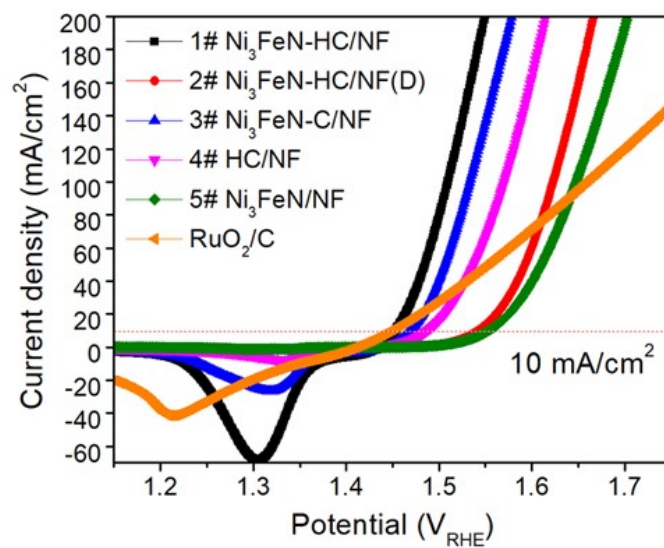

Figure. S10. OER linear sweeping voltammetry curves by negative scanning of different electrodes ( $\text{Ni}_3\text{FeN-HC/NF}$ ,  $\text{Ni}_3\text{FeN-HC/NF(D)}$ ,  $\text{Ni}_3\text{FeN-C/NF}$ ,  $\text{HC/NF}$ ,  $\text{Ni}_3\text{FeN/NF}$  and  $\text{RuO}_2/\text{C}$ ).

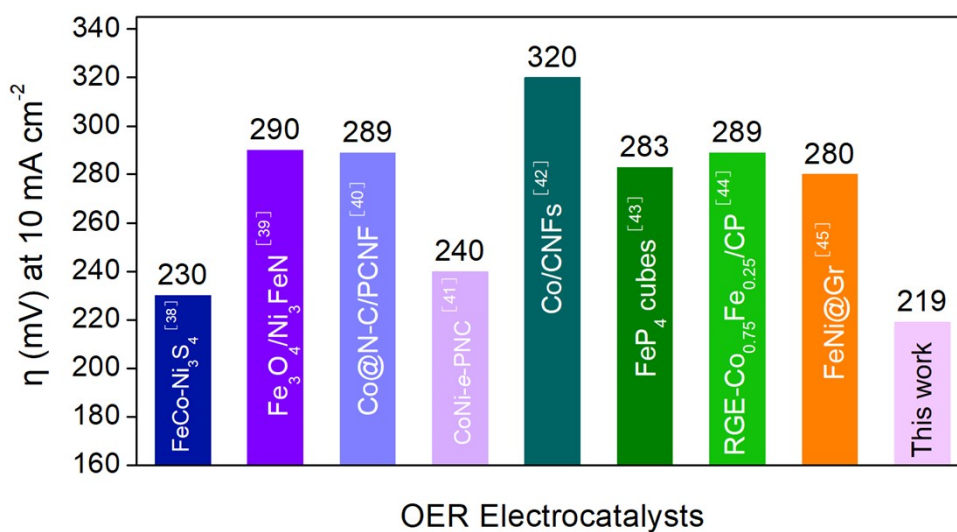

Figure. S11. Comparison of overpotential at 10 mA  $\text{cm}^{-2}$  for  $\text{Ni}_3\text{FeN-HC/NF}$  with currently reported OER electrocatalysts.

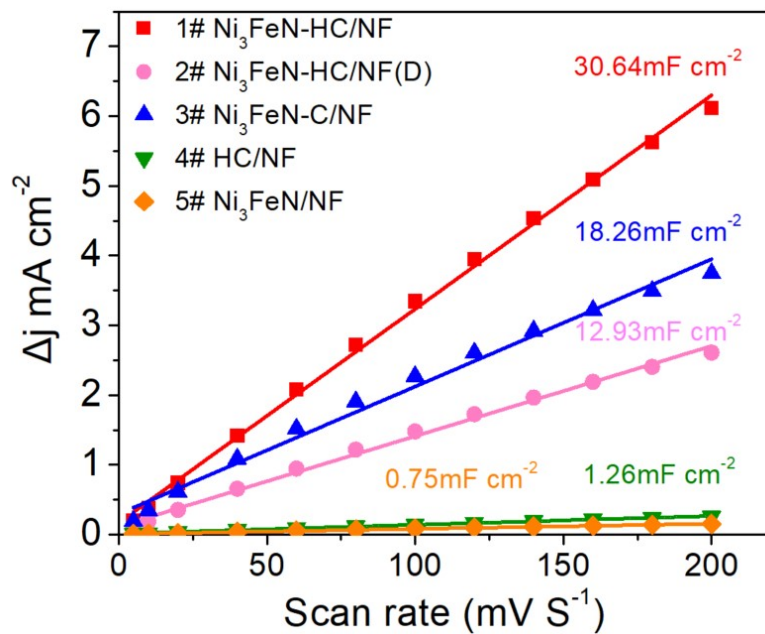

Figure. S12. The double-layer current density difference plotted as a function of scan rate fitted to a linear regression for  $C_{dl}$  of  $Ni_3FeN-HC/NF$ ,  $Ni_3FeN-HC/NF(D)$ ,  $Ni_3FeN-C/NF$ ,  $HC/NF$  and  $Ni_3FeN/NF$ .

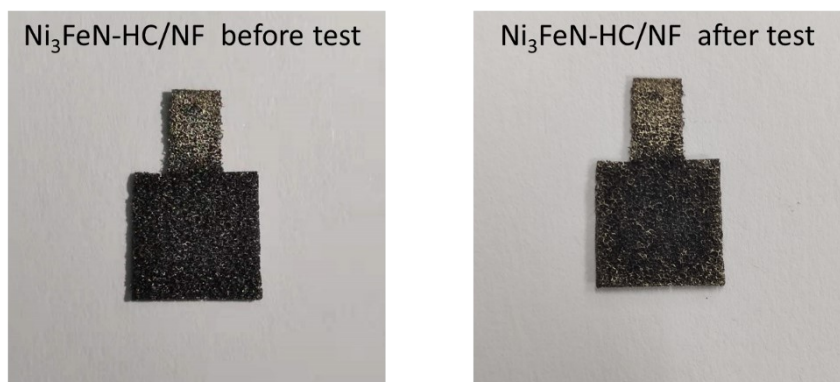

Figure. S13. The photograph of  $Ni_3FeN-HC/NF$  electrode and  $Ni_3FeN-HC/NF$  electrode after OER.

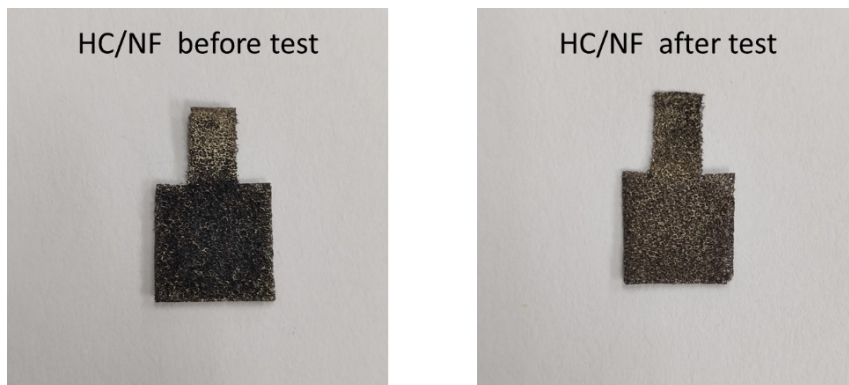

Figure. S14. The photograph of HC/NF electrode and HC/NF electrode after OER.

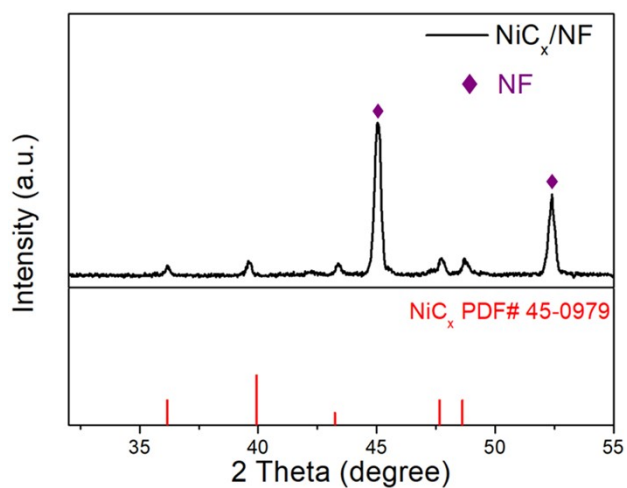

Figure. S15. XRD pattern of NiC<sub>x</sub>/NF.

The NiC<sub>x</sub>/NF was prepared according to the previous report.<sup>5</sup> The main peaks at 36.15°, 39.64°, 43.37°, 47.74° and 48.69° are well matched with (114), (204), (205), (123) and (009) of NiC<sub>x</sub> (PDF#45-0979); and other peaks belong to NF. This result suggests the NiC<sub>x</sub> was synthesized on the surface of NF successfully

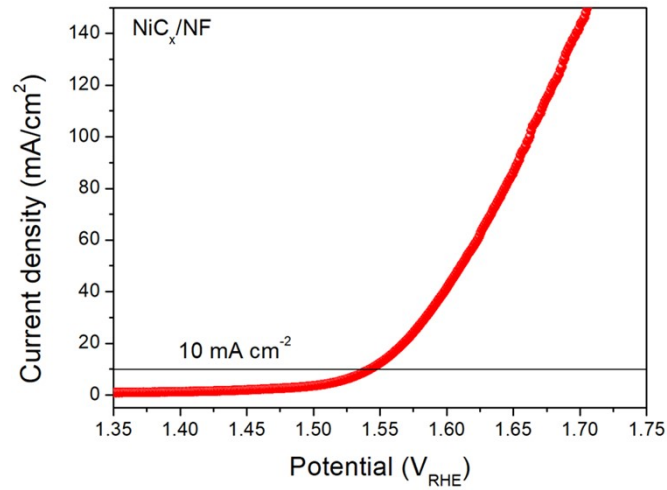

Figure. S16. OER linear sweeping voltammetry curve of  $\text{NiC}_x/\text{NF}$ .

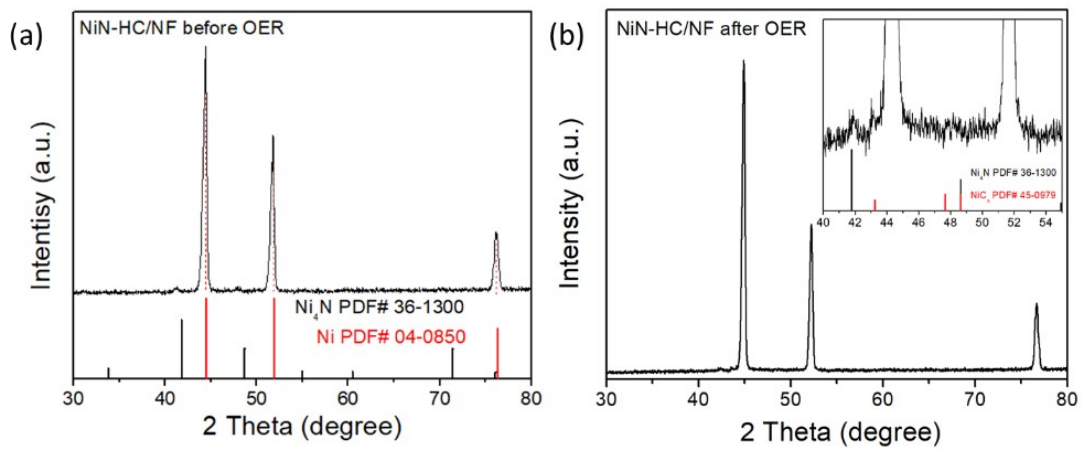

Figure. S17. XRD patterns spectra of  $\text{NiN-HC/NF}$  before and after 72 hours OER stability testing.

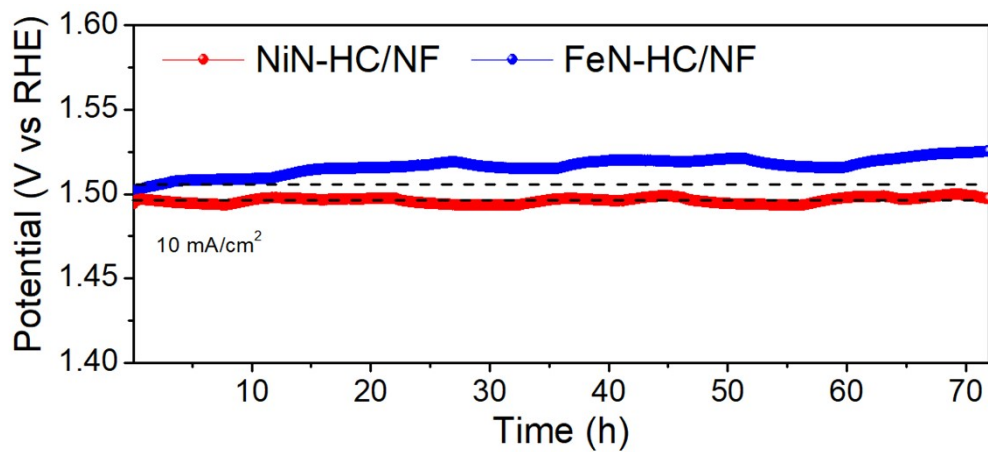

Figure S18. Long-term stability testing of the set of NiN-HC/NF and FeN-HC/NF at  $10 \text{ mA cm}^{-2}$ .

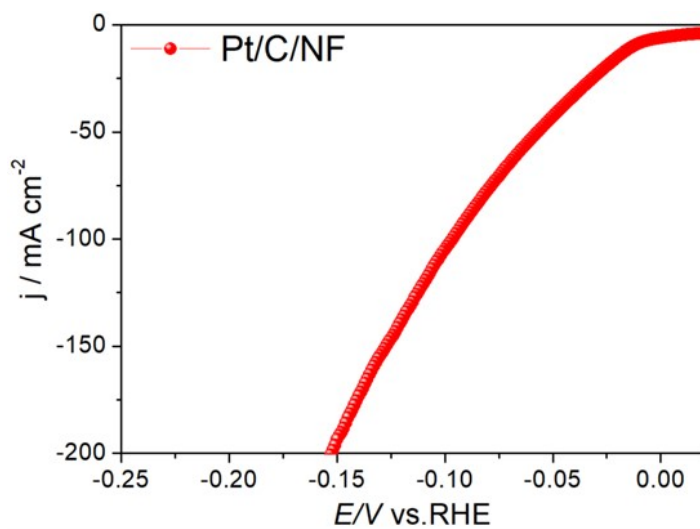

Figure. S19. LSV curve of Pt/C/NF towards HER in 1M KOH.

This Pt/C/NF electrode possesses a relatively smaller overpotential of 12 mV for HER in 1.0 M KOH according to the LSV curves

Table S1. TOC, TIC and ICP-MS result of the concentration of C, Fe and Ni in 1 M KOH electrolyte before and after stability test of 72 hours for Ni<sub>3</sub>FeN-HC/NF electrode.

| Element concentration |     | Original electrolyte | Electrolyte after stability testing of 72 h |
|-----------------------|-----|----------------------|---------------------------------------------|
| C (mg/L)              | TOC | 1.503                | 2.263                                       |
|                       | TIC | 1.707                | 1.696                                       |
| Fe (mg/L)             |     | 0.0013               | 0.0233                                      |
| Ni (mg/L)             |     | 0.0004               | 0.0061                                      |

## Notes and references

1. L. Sheng, L. Jiang, T. Wei, Z. Liu and Z. Fan, *Adv. Energy Mater.*, 2017, **7**, 1700668.
2. J. Zhu, E. Jiang, X. Wang, Z. Pan, X. Xu, S. Ma, P. Kang Shen, L. Pan, M. Eguchi, A. K. Nanjundan, J. Shapter and Y. Yamauchi, *Chem. Eng. J.*, 2022, **427**, 130946.
3. G. Zhang, J. Zeng, J. Yin, C. Zuo, P. Wen, H. Chen and Y. Qiu, *Appl. Catal., B*, 2021, **286**, 119902.
4. C. Walter, P. W. Menezes, S. Orthmann, J. Schuch, P. Connor, B. Kaiser, M. Lerch and M. Driess, *Angew. Chem., Int. Ed.*, 2018, **57**, 698-702.
5. H. Yang, S. Luo, X. Li, S. Li, J. Jin and J. Ma, *J. Mater. Chem. A*, 2016, **4**, 18499-18508.
